# Supplementary material for: Fabrication of syntactic foam fillers via manipulation of on-chip quasi concentric nanoparticle-shelled droplet templates
Source: Royal Society of Chemistry journal article supplement (doi:10.1039/d0lc00730g), 2020-01-01
Supplement: d0lc00730g3.pdf [file d0lc00730g3.pdf]

## Supporting information

### Fabrication of syntactic foam filler via on-chip quasi concentric nanoparticle-shelled droplet templates manipulation

**Video. S1.** 8x slow motion of buoyancy comparison experiment result of the buoyant syntactic foam specimen.

**Video. S2.** 8x slow motion of buoyancy comparison experiment result of the sinkable plain PDMS sample.
